# Supplementary material for: Bismuth germanate (Bi4Ge3O12), a promising high-capacity lithium-ion battery anode
Source: Royal Society of Chemistry journal article supplement (doi:10.1039/c8cc05861j), 2018-01-01
Supplement: c8cc05861j1.pdf [file c8cc05861j1.pdf]

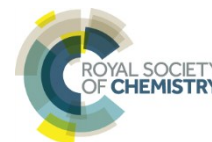

ChemComm

Support Information

## Bismuth Germanate ( $\text{Bi}_4\text{Ge}_3\text{O}_{12}$ ), a Promising High-Capacity Lithium-ion Battery Anode

Received 00th January 20xx,  
Accepted 00th January 20xx

DOI: 10.1039/x0xx00000x

[www.rsc.org/](http://www.rsc.org/)

Jassiel R. Rodriguez,<sup>a</sup> Carlos Belman-Rodriguez,<sup>b,c</sup> Sergio A. Aguila,<sup>c</sup> Yanning Zhang,<sup>d</sup> Hongxian Liu,<sup>d</sup> and Vilas G. Pol<sup>a,\*</sup>

### Section 1. Materials and method

**Section 2. Raman spectroscopy**

**Section 3. FT-IR spectroscopy**

**Section 4. Ex-situ XRD**

**Section 5. DFT calculations**

## Materials Synthesis

$\text{Bi}_4\text{Ge}_3\text{O}_{12}$  (BGO) micropowders were prepared through a sol-gel method using  $\text{GeO}_2$  (germanium oxide, 99.99%) and  $\text{Bi}_2\text{O}_3$  (bismuth oxide, 99.99%) and  $\text{C}_4\text{H}_6\text{O}_6$  (L (+)-tartaric acid, 99.5%) as received from Sigma Aldrich. Stoichiometric amounts of germanium and bismuth oxides were dissolved in 50 mL of concentrated nitric acid (70%  $\text{HNO}_3$ ) and stirred at room temperature overnight. Followed by that, 15 mL of a L (+)-tartaric acid solution (0.0171 moles of tartaric acid per BGO gram) was added to the acid mixture and stirred constantly during 3 h. The resultant mixture was heated at 80 °C for another 2 h followed by heated to 100 °C until forming an xerogel. Finally, the resultant powder was annealed at 850 °C for 4h

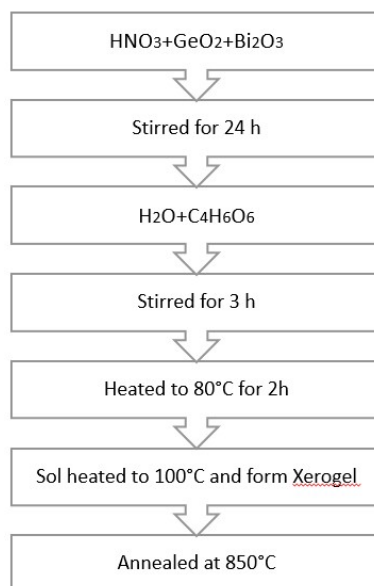

**Figure S11.** Flowchart of the synthesis of  $\text{Bi}_4\text{Ge}_3\text{O}_{12}$  through a sol-gel precursor method with tartaric acid assistance.

## Structure characterization

$\text{Bi}_4\text{Ge}_3\text{O}_{12}$  (BGO) micropowder was analysed by X-ray diffraction (XRD), Scanning electron microscopy (SEM), Transmission electron microscopy (TEM), Infrared and Raman spectroscopies, and  $\text{N}_2$  physisorption. using a Philips X'pert diffractometer with a Cu  $K\alpha$  radiation ( $\lambda = 1.57 \text{ \AA}$ ), a JEOL JSM 5300 in secondary electron mode, a JEOL JEM-2010 in bright mode, a Nexus-760 FTIR spectrometer with *in situ* Harrick cell, a Thermo-Scientific DXR Raman Microscope with a 633 nm laser and a Quantachrome Nova 2200e surface analyzer at 77K, respectively.

## Electrochemical testing

A slurry mixture of 70 wt% BGO, 10 wt% graphene (Sigma Aldrich), 10 wt% carbon Super P (TIMCAL), and 10 wt% CMC (MTI) along with required amount of water were homogeneously mixed. The resultant thick slurry was coated uniformly on a copper foil using a doctor blade method. The coated BGO laminate was dried at 80 °C overnight under vacuum, and then punched into diameter of 12 mm disk electrodes. Then, CR2032 coin cells were assembled, using the prepared electrode as a working electrode, Li metal foil as a counter electrode, and polypropylene film (Celgard 2500) as a separator, in an inert argon-filled glovebox. The electrolyte used was 1 M  $\text{LiPF}_6$  in EC: DEC with 1: 1 volume ratio. Cyclic voltammetry (CV) analysis were performed between a voltage window of 0.01–3 V vs  $\text{Li/Li}^+$  at a scan rate of 0.2  $\text{mV s}^{-1}$  using Electrochemistry test station Gamry Reference 600. Charge-discharge Galvanostatic cycling data were collected from an Arbin BT-2000 Potentiostat.

## DFT calculations

DFT (Density functional theory) calculations were achieved using the planewave-based VASP (Vienna ab-initio simulation package). GGA (generalized gradient approximation) method within PBE (Perdew-Burke-Ernzerh) of exchange-correlation functional and PAW (projector augmented wave) potentials were adopted through the work. The kinetic energy cut-off for the plane-wave expansion was established to 520 eV, and the Brillouin-zone integrations for the geometry optimizations were sampled by a  $(3 \times 3 \times 3)$  Monkhorst-Pack mesh. The convergence threshold for self-consistent energy error was set to  $1 \times 10^{-5}$  eV, and both atomic and lattice parameters coordinates were fully relaxed until the maximum force is smaller than 0.03  $\text{eV/\AA}$  for each atom.

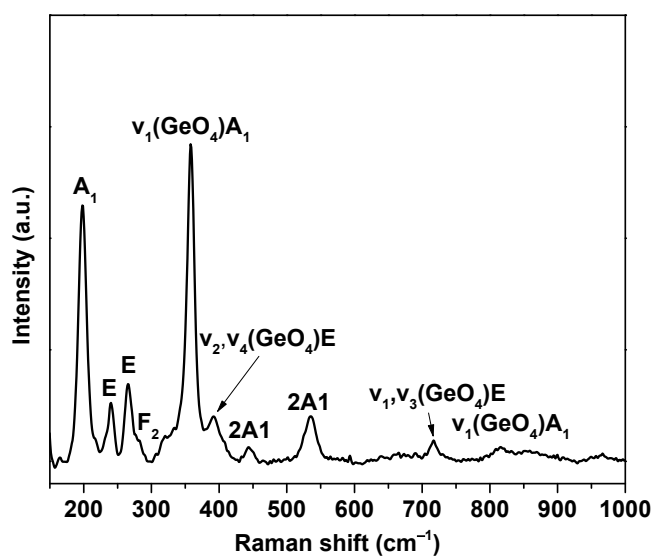

**Figure S12.** Raman information of BGO, with its characteristic Raman active modes.

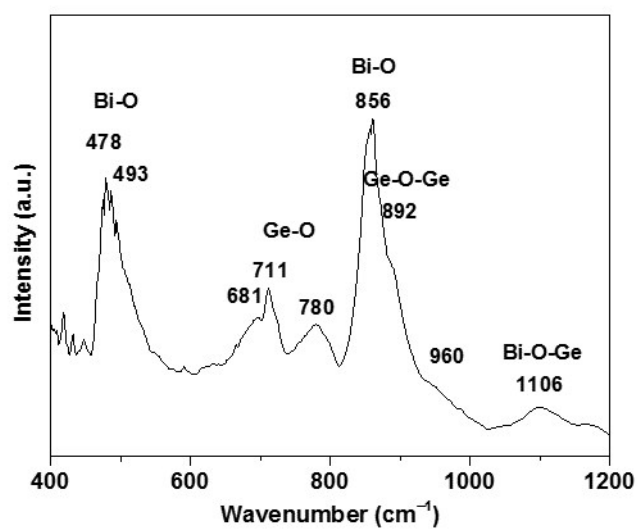

**Figure S13.** FT-IR spectra of BGO, with its characteristic FT-IR active modes.

After one charge-discharge cycle, the XRD pattern of BGO pristine material disappeared, indicating that BGO phase transformation through a lithiation reaction is not reversible. The X-ray peaks observed after first C-D cycle at  $2\theta$  of  $27.2^\circ$ ,  $46.0^\circ$ , and  $55.4^\circ$  correspond to the (201), (222) and (421) planes of the tetragonal crystal system of  $\beta\text{-Bi}_2\text{O}_3$ , respectively, in agreement with JCPDS PDF 27-0050. Also, The X-ray peaks observed at  $2\theta$  of  $26.4^\circ$ ,  $38.0^\circ$ ,  $39.7^\circ$ ,  $48.8^\circ$  and  $56.1^\circ$  correspond to the (101), (102), (111), (112) and (210) planes of the hexagonal crystal system of  $\text{GeO}_2$ , respectively, in agreement with JCPDS PDF 36-1463. No diffraction peaks of BGO is observed in the XRD pattern, indicating its transformation to other two phases.

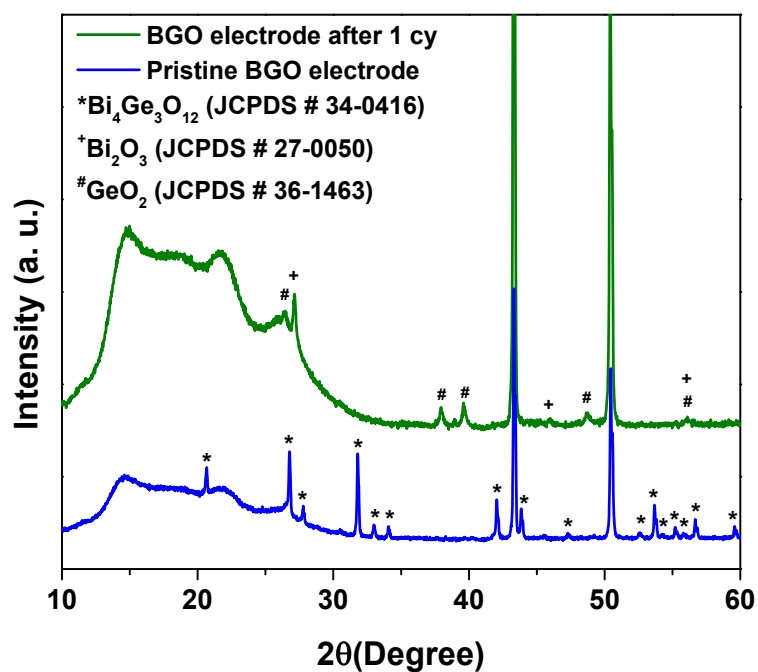

**Figure S14.** Ex-situ XRD pattern of BGO anode after first cycle of charge-discharge between 0.01 to 3.0 V vs Li/Li<sup>+</sup>.

When one Li atom was put in Bi<sub>4</sub>Ge<sub>3</sub>O<sub>12</sub>, the structure in the left panel in Fig. S14 is energetically preferred where Li is surrounded by O atoms. Our preliminary results on the structural stabilities of Li<sub>x</sub>Bi<sub>4</sub>Ge<sub>3</sub>O<sub>12</sub> with high Li compositions reveal the breaking of Bi-O bonds and the appearance of some Bi-Bi bonds with the increasing of Li, such as Li<sub>6</sub>Bi<sub>4</sub>Ge<sub>3</sub>O<sub>12</sub> in the middle panel. In contrast, the Ge-O bonds (i.e. the green tetrahedra) are hard to be broken in a large x range, as shown in the example of Li<sub>10</sub>Bi<sub>4</sub>Ge<sub>3</sub>O<sub>12</sub>.

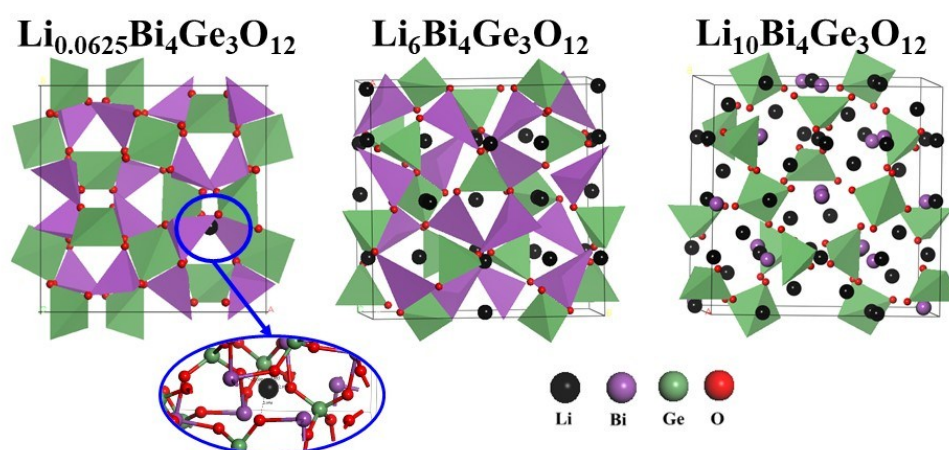

**Figure S15.** Simulated insertion of 6 and 10  $\text{Li}^+$ -ions inside  $\text{Bi}_4\text{Ge}_3\text{O}_{12}$  crystal structure.
